# Supplementary material
Source: PubMed Central journal article supplement (PMC6738203)
Supplement: jin-0011-0125-s01.pdf [file jin-0011-0125-s01.pdf]

## Supplementary Material

### Staphylococcus epidermidis activates aryl hydrocarbon receptor (AhR) signaling in human keratinocytes: Implications for cutaneous defense

Franziska Rademacher, Maren Simanski, Bettina Hesse, Gregor Dombrowsky, Nikolas Vent, Regine Gläser and Jürgen Harder

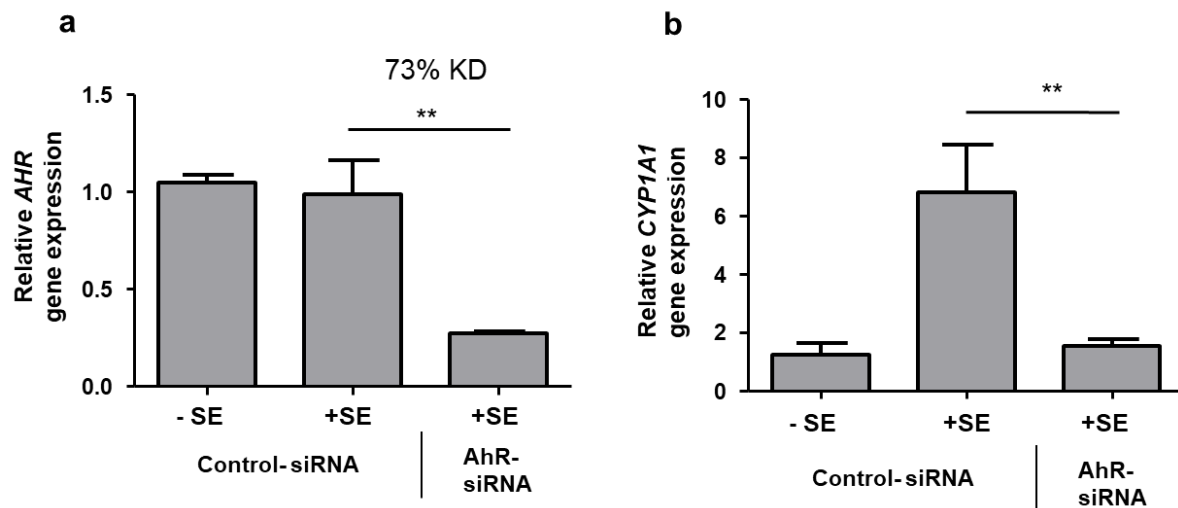

**Supplementary Figure 1. Induction of the AhR-responsive gene CYP1A1 by *S. epidermidis* in human keratinocytes is mediated by the AhR.** Human primary keratinocytes were transfected with a control siRNA or an AhR-specific siRNA (s1200) and stimulated with *S. epidermidis* strain ATCC 14990 (SE). Knockdown efficiency (KD) of AhR gene expression (a) and CYP1A1 gene expression (b) were analyzed by real-time PCR. Bars are means  $\pm$  SEM of 6 stimulations (\*\*p<0.01, Student's *t*-test).

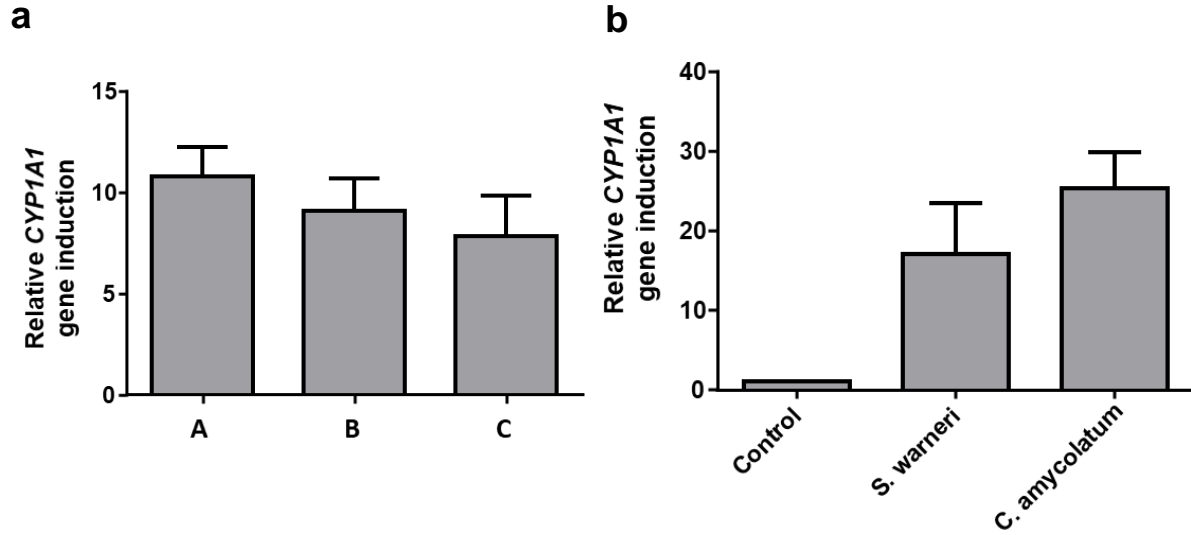

**Supplementary Figure 2. Different bacterial isolates induce CYP1A1 gene expression.**

Human primary keratinocytes were stimulated with supernatants of three skin-derived isolates of *S. epidermidis* (A-C) derived from different individuals (**a**) or with supernatants of *Staphylococcus warneri* and *Corynebacterium amycolatum* (clinical isolates). Relative *CYP1A1* gene induction was determined by real-time PCR. Data are presented as means  $\pm$  SEM of two (**a**) or three (**b**) stimulations.

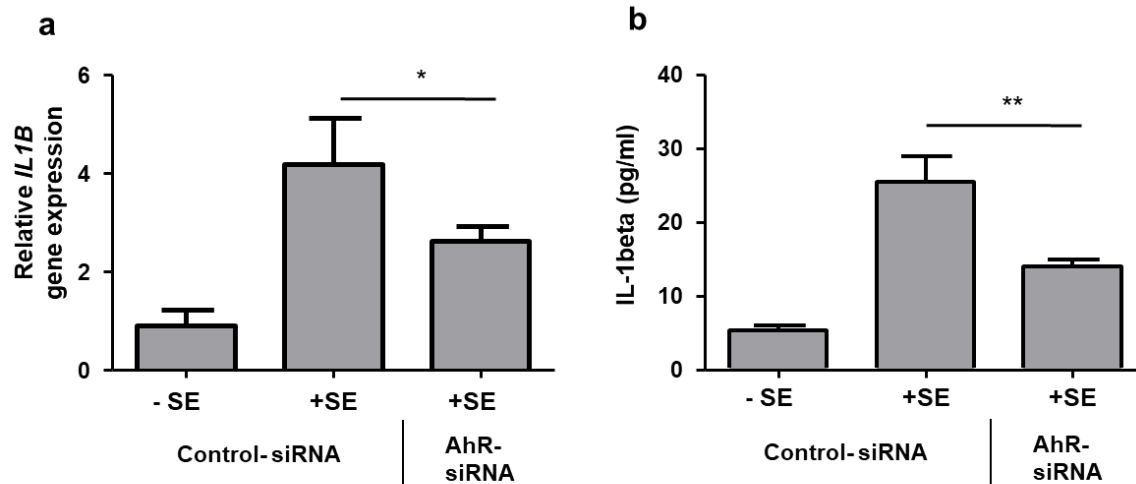

**Supplementary Figure 3. Induction of IL-1beta by *S. epidermidis* in human keratinocytes is mediated by the AhR.** Human primary keratinocytes were transfected with a control siRNA or an AhR-specific siRNA (s1200; 73% gene expression knockdown efficiency (see Fig. S1a)) and stimulated with *S. epidermidis* strain ATCC 14990 (SE). IL-1beta gene expression and protein secretion was determined by real-time PCR (**a**) and ELISA (**b**), respectively. Bars are means  $\pm$  SEM of 6 stimulations (\*\* $p < 0.01$ , Student's *t*-test).

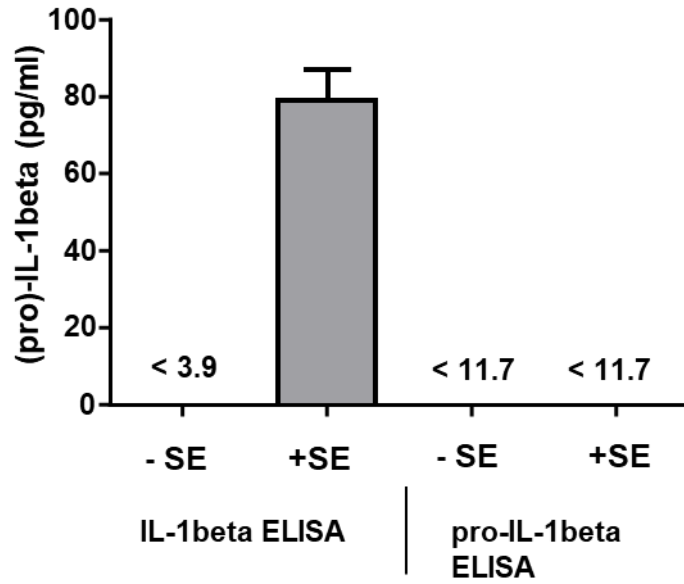

**Supplementary Figure 4. *S. epidermidis* induces release of mature IL-1beta by human keratinocytes.** Human primary keratinocytes were stimulated for 6 h with *S. epidermidis* strain ATCC 14990 (SE). Supernatants were analyzed by an IL-1beta and pro-IL-1beta ELISA. Bars are means  $\pm$  SEM of three stimulations.

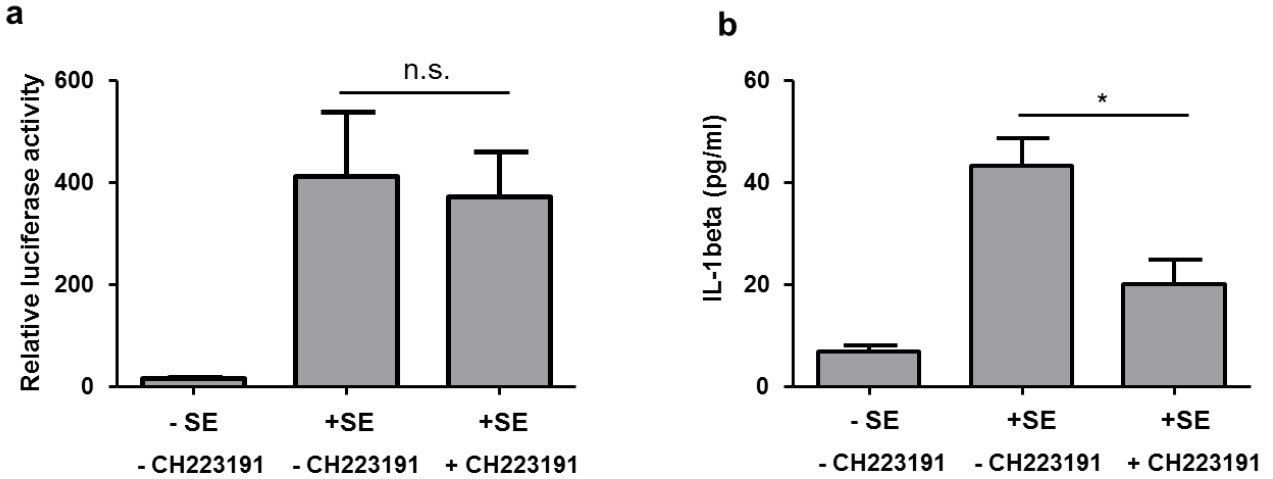

**Supplementary Figure 5. AhR has no influence on proteolytic processing of pro-IL-1beta.**

Human primary keratinocytes were transfected with iGLuc, a luciferase reporter that releases luciferase activity in the supernatant upon cleavage of pro-IL-1beta. The cells were stimulated with a clinical isolate of *S. epidermidis* (SE) in the presence or absence of the specific AhR inhibitor CH223191. **(a)** Luciferase activity was determined to analyze proteolytic processing of pro-IL-1beta. **(b)** Release of IL-1beta was determined by ELISA. Data are presented as means  $\pm$  SEM of three stimulations (\* $p < 0.05$ , n.s. = not significant, Student's *t*-test).

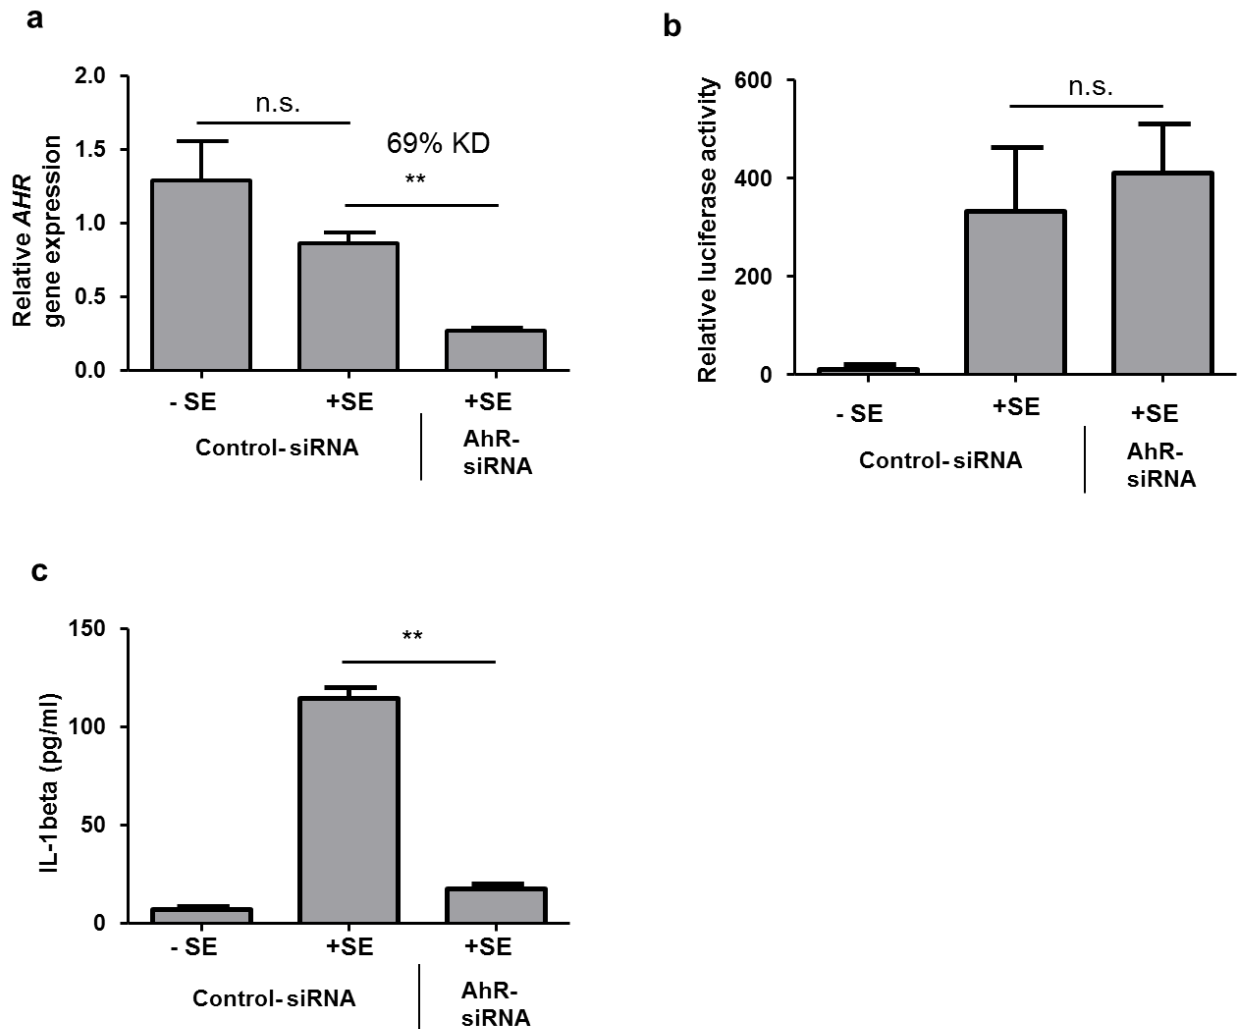

**Supplementary Figure 6. AhR has no influence on proteolytic processing of pro-IL-1beta.** Human primary keratinocytes were transfected with an AhR-specific siRNA (s1199). 1 day before stimulation cells were additionally transfected with iGLuc, a luciferase reporter that releases luciferase activity in the supernatant upon cleavage of pro-IL-1beta. Cells were stimulated with a clinical isolate of *S. epidermidis* (SE). **(a)** Knockdown efficiency (KD) of AhR gene expression was determined by real-time PCR. **(b)** Luciferase activity was determined to analyze proteolytic processing of pro-IL-1beta. **(c)** Release of IL-1beta was determined by ELISA. Data are presented as means  $\pm$  SEM of three stimulations (\*\* $p < 0.01$ , n.s. = not significant, Student's *t*-test).

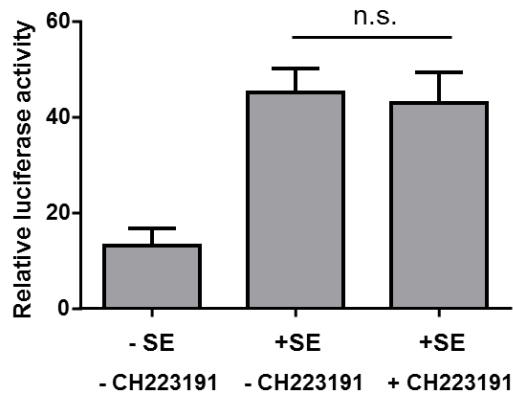

**Supplementary Figure 7. AhR has no influence on NF-kappaB.** Human primary keratinocytes were transfected with a NF-kappaB *firefly* luciferase reporter plasmid and a *renilla* luciferase control plasmid. The cells were stimulated with a clinical isolate of *S. epidermidis* (SE) in the presence or absence of the specific AhR inhibitor CH223191. NF-kappaB activation was determined by analyzing luciferase activity which was determined as the ratio between *firefly* and *renilla* luciferase activities in each sample. Data are presented as means  $\pm$  SEM of three stimulations. (n.s. = not significant, Student's *t*-test).

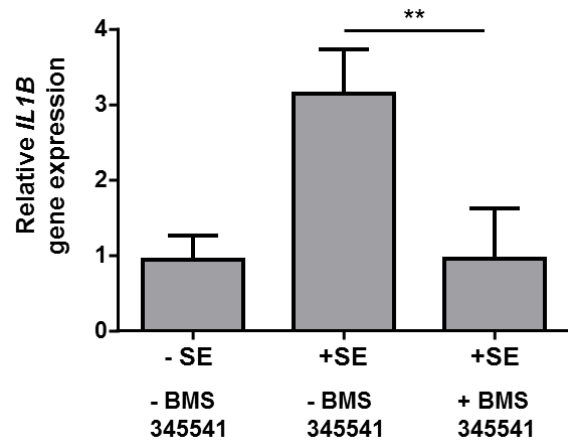

**Supplementary Figure 8. The *S. epidermidis*-induced IL-1beta gene expression requires NF- $\kappa$ B.** Human primary keratinocytes were stimulated with a clinical isolate of *S. epidermidis* (+SE) in the presence or absence of the specific NF- $\kappa$ B inhibitor BMS 345541. IL-1beta gene expression was determined by real-time PCR. Bars are means  $\pm$  SEM of six stimulations (\*\*P < 0.01, Student's *t*-test).
